# Supplementary material
Source: Royal Society of Chemistry journal article supplement (doi:10.1039/d6ta00128a)
Supplement: d6ta00128a1.pdf [file d6ta00128a1.pdf]

**Dual confinement strategy for Pt–Co intermetallic electrocatalyst with superior durability in proton exchange membrane fuel cells**

Shuoyao Yin <sup>a,b,\*</sup>, Yuankai Shao <sup>a,b</sup>, Bingjie Zhou <sup>a,b</sup>, Weikang Zhu <sup>a,b</sup>, Lingwei Meng <sup>a,b</sup>, Anqi Dong <sup>a,b</sup>, and Zhenguo Li <sup>a,b,\*</sup>

<sup>a</sup>. National Engineering Laboratory for Mobile Source Emission Control Technology, China Automotive Technology & Research Center Co., Ltd, Tianjin 300300, China.

<sup>b</sup>. Low-carbon Environmental Protection Department, CATARC Automobile Inspection Center (Tianjin) Co., Ltd, Tianjin, 300300, China

\*Corresponding Author: Zhenguo Li, E-mail address: [lizhenguo@catarc.ac.cn](mailto:lizhenguo@catarc.ac.cn)

Shuoyao Yin, E-mail address: [yinshuoyao@catarc.ac.cn](mailto:yinshuoyao@catarc.ac.cn)

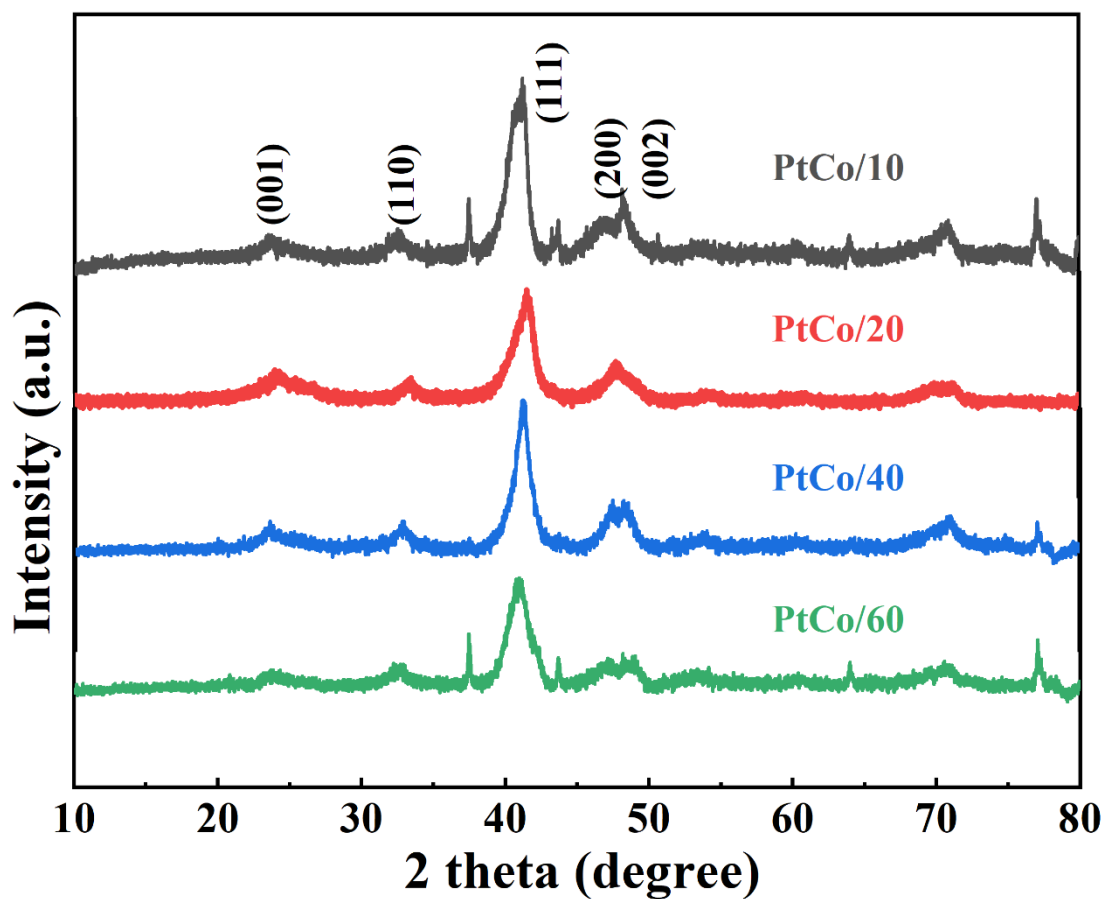

**Figure S1.** X-ray diffraction (XRD) patterns of PtCo NPs treated with different amount of dopamine.

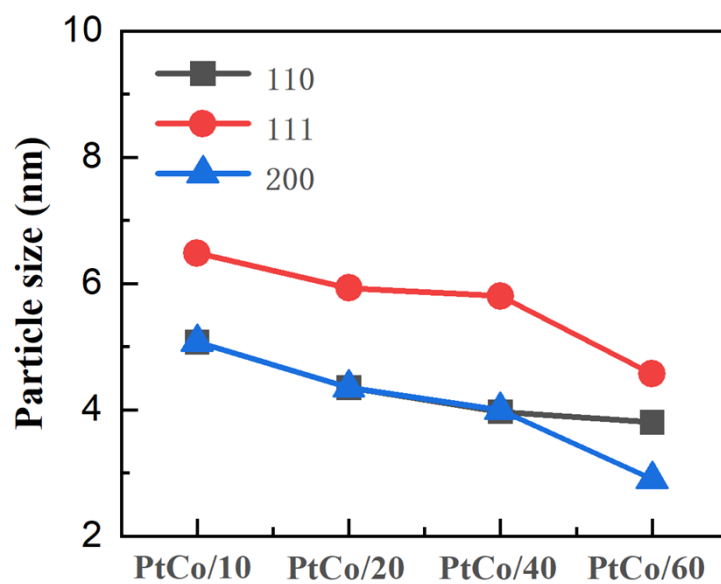

**Figure S2.** Particle size calculated by XRD patterns of PtCo NPs treated with different amount of dopamine.

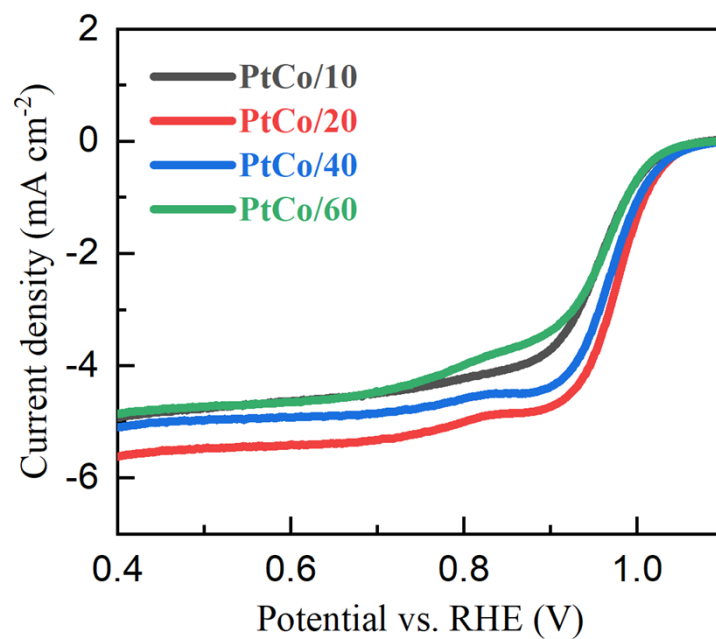

**Figure S3.** Oxygen reduction reaction (ORR) performance of PtCo NPs treated with different amount of dopamine.

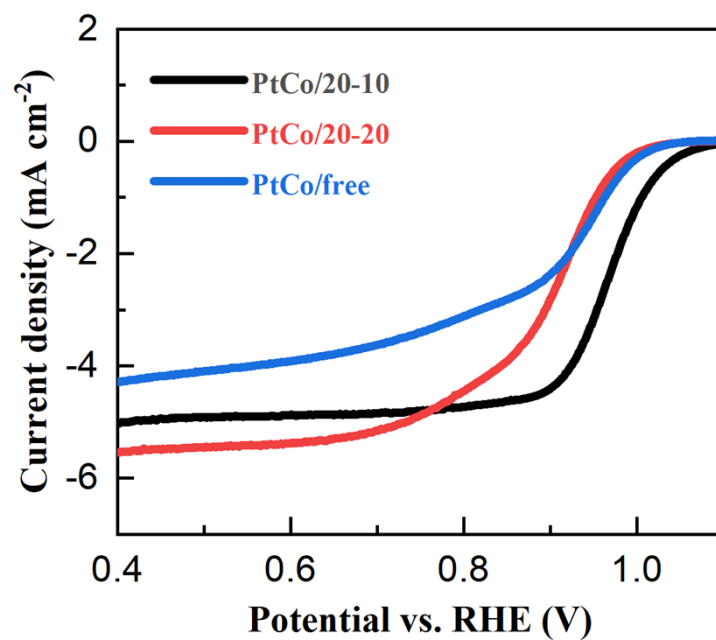

**Figure S4.** ORR performance of PtCo NPs treated with different amount and sequence of dopamine.

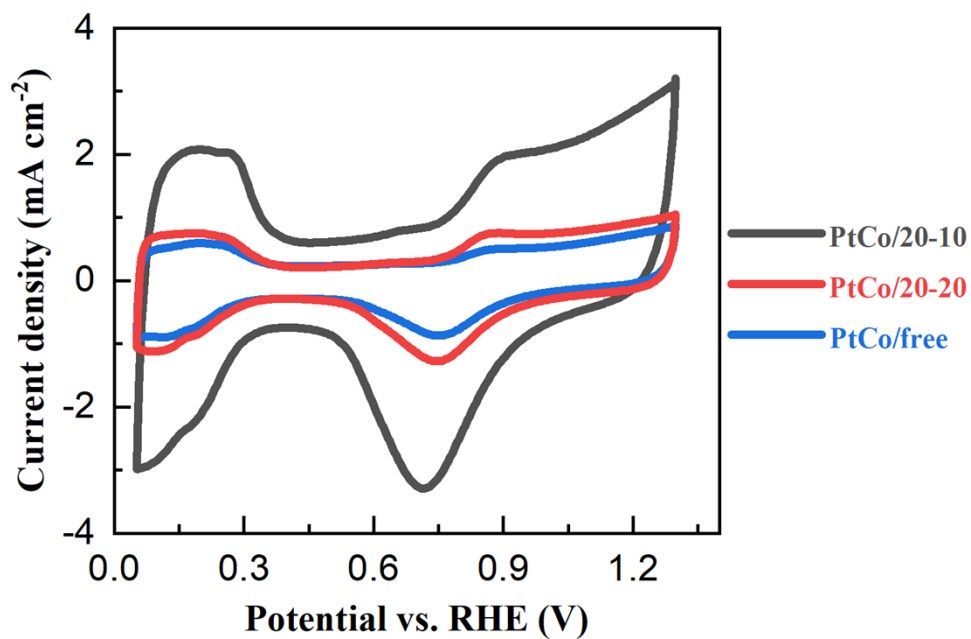

**Figure S5.** The electrochemical active surface area (ECSA) of PtCo NPs treated with different amount and sequence of dopamine.

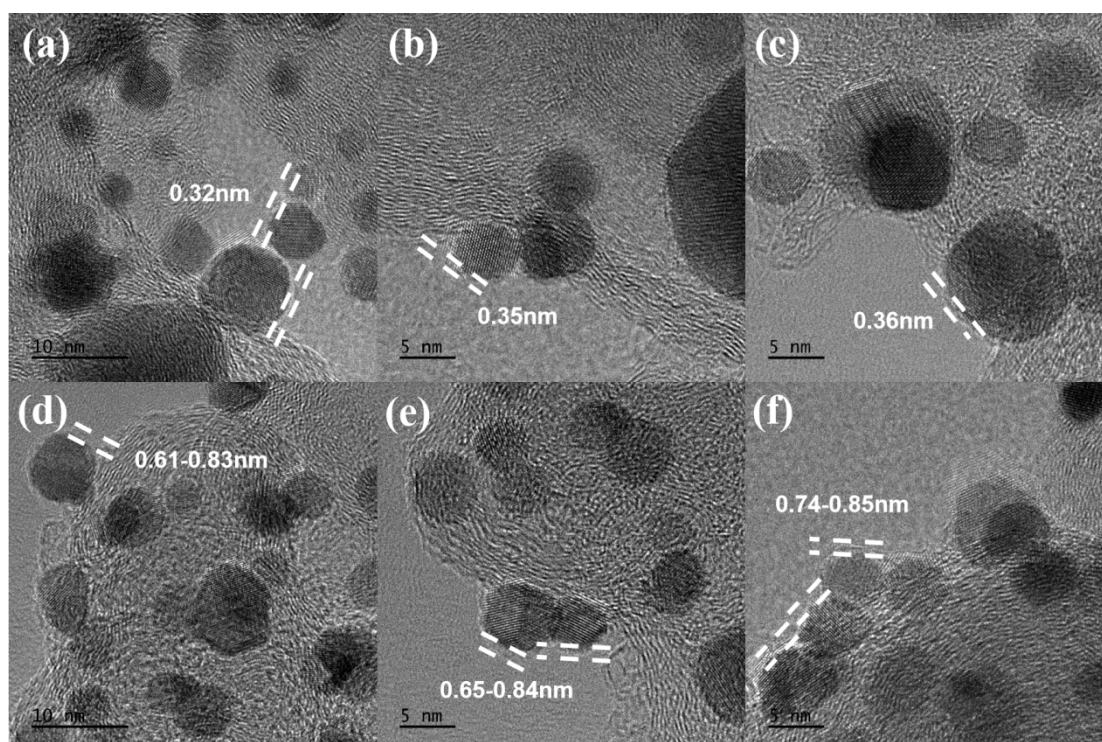

**Figure S6** More transmission electron microscope images of the PtCo/20 (a-c) and PtCo/20-10 (d-f), respectively.

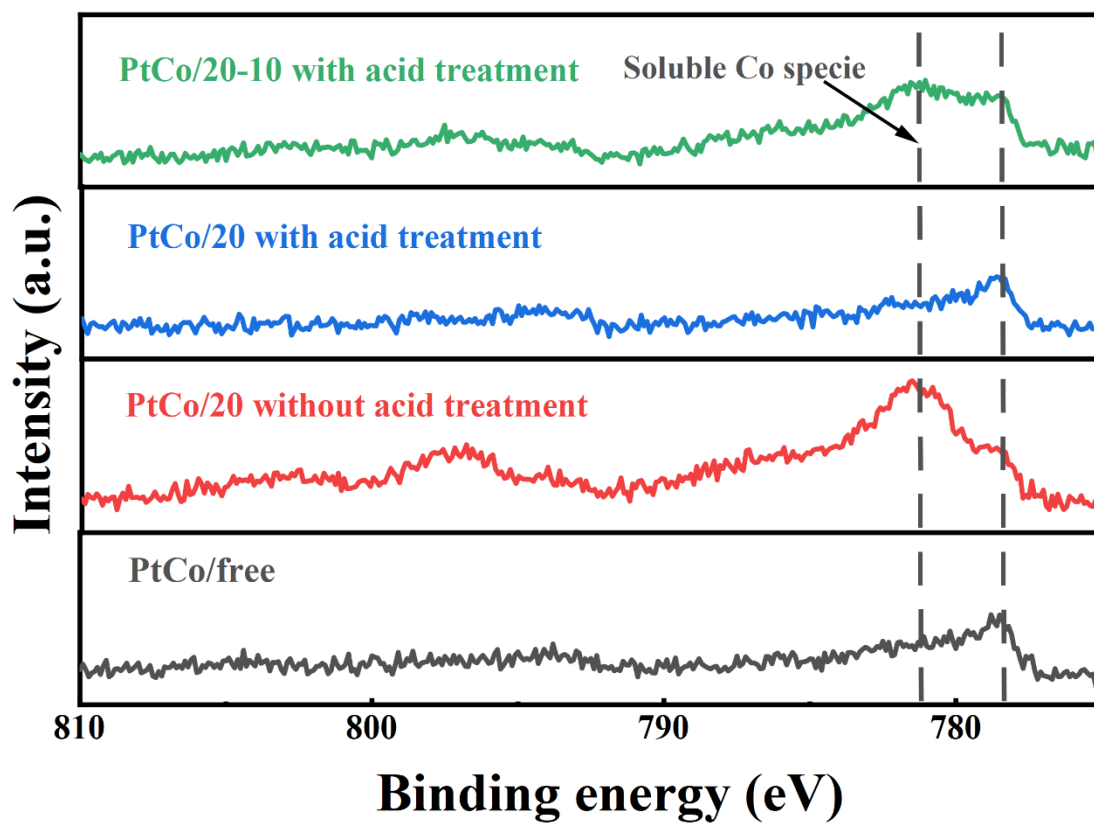

Fig S7. X-ray photoelectron spectroscopy (XPS) of Pt–Co/C-DA-free, Pt–Co/C-DA-20 with and without heat treatment and Pt–Co/C-DA-20-DA-10.

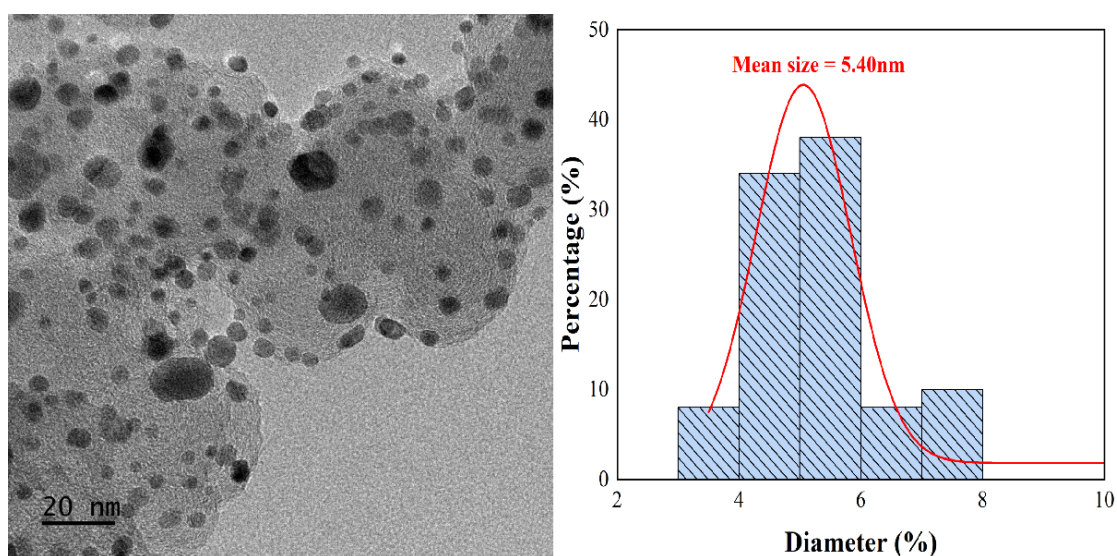

Figure S8. TEM images of PtCo/20 with secondary heat treatment. The corresponding

images on the right show the particle size histogram.

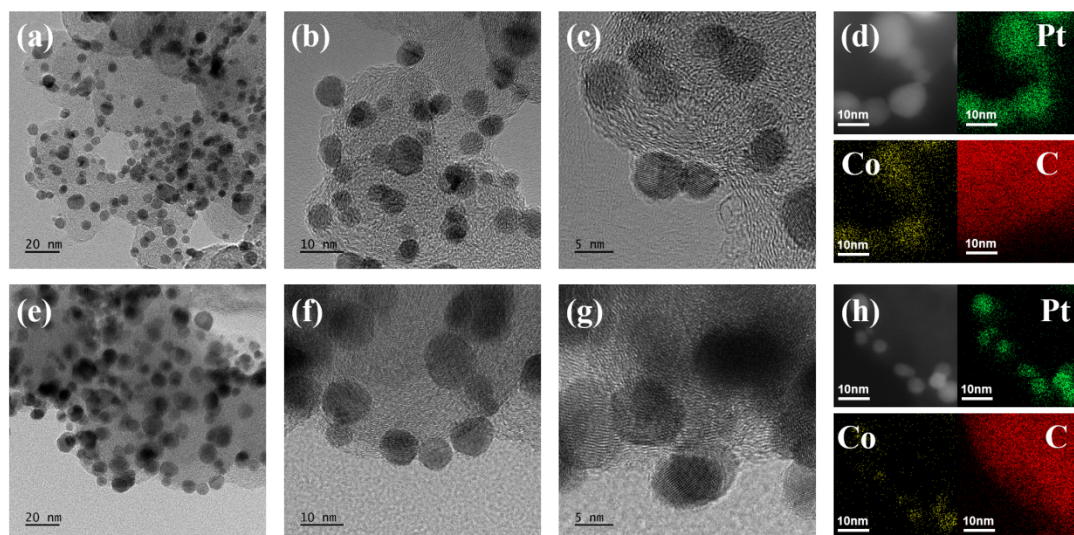

**Figure S9.** Transmission electron microscope images images of PtCo/20-10 and PtCo/20 catalysts after cycling (a-d) PtCo/20-10 and PtCo/20 (e-h) , respectively.

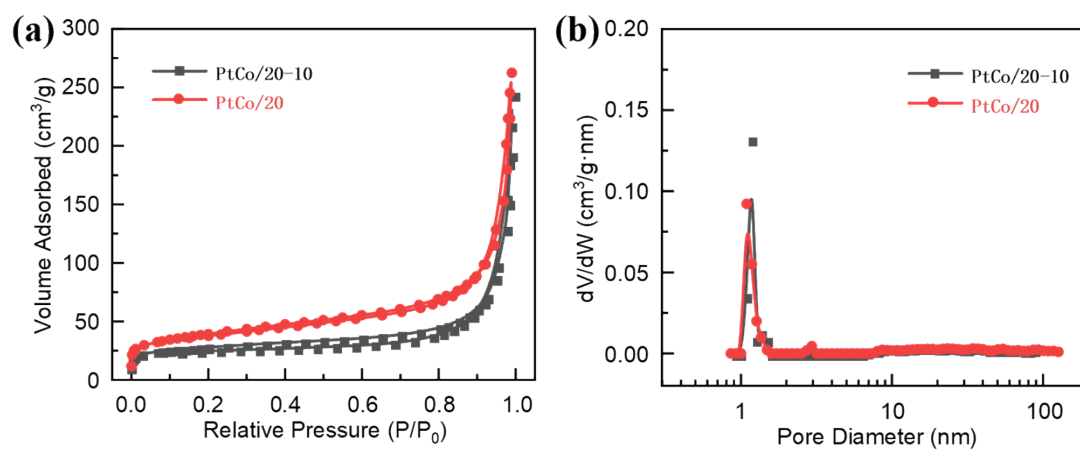

**Figure S10.** (a) N<sub>2</sub> adsorption–desorption isotherms and corresponding (b) pore size distributions of PtCo/20-10 and PtCo/20.

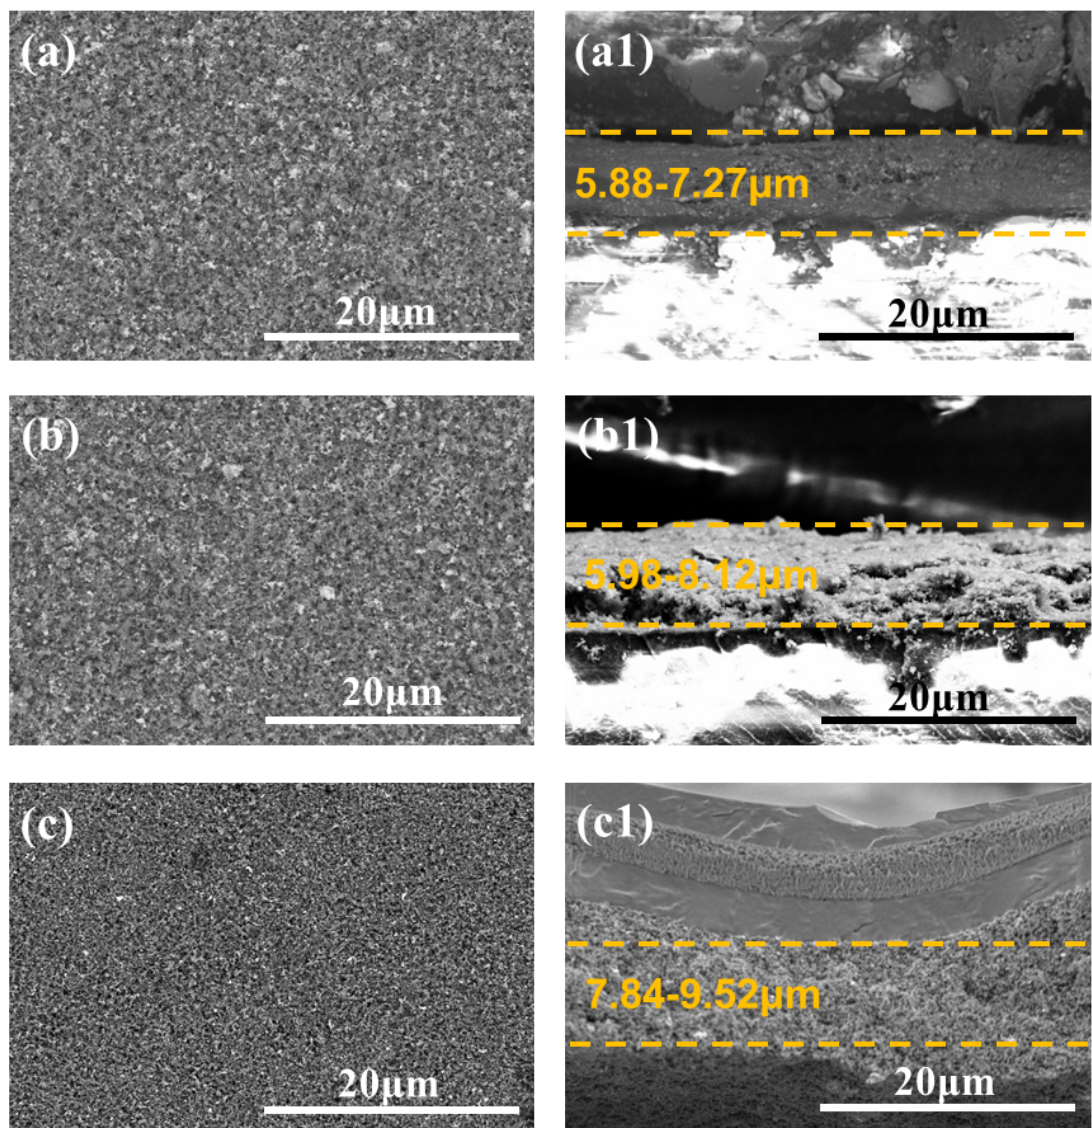

**Figure S11** The SEM images of the three cathode electrodes. Planar (a) and cross-sectional (a1) images of PtCo/20-10-based cathode electrode; Planar (b) and cross-sectional (b1) images of PtCo/20-based cathode electrode; Planar (c) and cross-sectional (c1) images of PtCo/free-based cathode electrode.

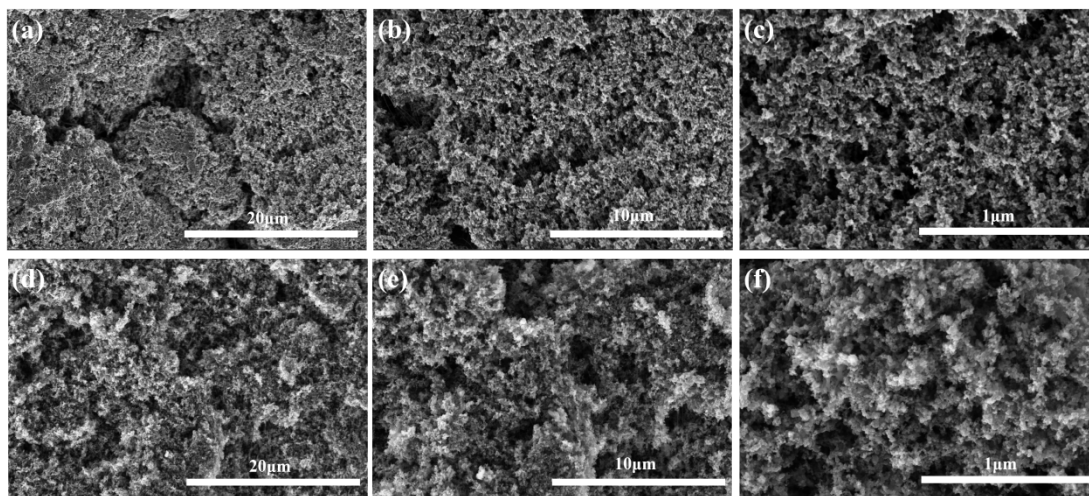

**Figure S12** Morphological characterizations of the cathode electrodes based on PtCo/20 and PtCo/20-10 catalysts after 30,000 accelerated durability test (ADT) cycles. (a–c) PtCo/20 catalyst-based cathode electrode; (d–f) PtCo/20-10 catalyst-based cathode electrode.

**Table S1.** ICP-MS measurement for PtCo NPs.

| Sample     | Pt/Co atomic ratio | Pt loading (wt%) |
|------------|--------------------|------------------|
| PtCo/20-10 | 0.93               | 19.04            |
| PtCo/20    | 0.94               | 19.14            |

**Table S2.** EXAFS fitting parameters at the Pt L3 –edge for samples

| Sample           | Shell | CN <sup>a</sup> | R(Å) <sup>b</sup> | $\sigma^2(\text{Å}^2)^c$ | R factor |
|------------------|-------|-----------------|-------------------|--------------------------|----------|
| Pt foil          | Pt-Pt | 12*             | 2.76±0.00         | 0.0044±0.00021           | 0.0022   |
| PtO <sub>2</sub> | Pt-O  | 6*              | 2.00±0.01         | 0.0025±0.0011            | 0.0077   |
| Pt sample        | Pt-O  | 1.0±0.2         | 1.97±0.01         | 0.0029±0.0021            | 0.001    |
|                  | Pt-Co | 2.7±0.5         | 2.65±0.00         | 0.0055±0.0011            |          |
|                  | Pt-Pt | 6.1±0.8         | 2.71±0.01         | 0.0065±0.00069           |          |

(a) CN, coordination number; (b) R, distance between absorber and backscatter atoms;

(c)  $\sigma^2$ , Debye-Waller factor to account for both thermal and structural disorders; R factor indicates the goodness of the fit

**Table S3.** EXAFS fitting parameters at the Co K –edge for samples

| Sample                         | Shell | CN <sup>a</sup> | R(Å) <sup>b</sup> | $\sigma^2(\text{Å}^2)^c$ | R factor |
|--------------------------------|-------|-----------------|-------------------|--------------------------|----------|
| Co foil                        | Co-Co | 12*             | 2.49±0.00         | 0.0063±0.00025           | 0.00052  |
| CoO                            | Co-O  | 6*              | 2.11±0.01         | 0.011±0.0028             | 0.011    |
|                                | Co-Co | 12*             | 3.01±0.01         | 0.0089±0.0011            |          |
| Co <sub>3</sub> O <sub>4</sub> | Co-O  | 4*              | 1.92±0.01         | 0.0021±0.0017            | 0.0094   |
| Co sample                      | Co-Pt | 11.9±1.3        | 2.67±0.02         | 0.0143                   | 0.019    |
|                                | Co-Co | 8.4±1.6         | 2.93±0.01         | 0.012                    |          |

(a) CN, coordination number; (b) R, distance between absorber and backscatter atoms;

(c)  $\sigma^2$ , Debye-Waller factor to account for both thermal and structural disorders; R factor indicates the goodness of the fit

**Table S4** Comparison of recently published Pt-Co catalyst in PEMFC.

| ORR catalyst                              | Chang of mass activity or ECSA in RDE                                           | Durability of PEMFC                                           | Ref.      |
|-------------------------------------------|---------------------------------------------------------------------------------|---------------------------------------------------------------|-----------|
| O-PtCo@GCoNC                              | Mass activity: 13.2% loss for 30000 cycles                                      | Voltage loss at 0.8A cm <sup>-2</sup> : 28mV for 30000 cycles | 1         |
| PtCo/P <sub>2.73</sub> O <sub>x</sub> -KB | Mass activity: 24.3% loss for 30000 cycles<br>ECSA: 13.4% loss for 30000 cycles | Voltage loss at 1.5A cm <sup>-2</sup> : 10mV for 30000 cycles | 2         |
| PtCo/CoNC                                 | Mass activity: 38.8% loss for 30000 cycles                                      | /                                                             | 3         |
| STG-assisted PtCo                         | /                                                                               | Voltage loss at 0.8A cm <sup>-2</sup> : 21mV for 30000 cycles | 4         |
| L1 <sub>0</sub> -N-PtCo-H@Pt/C            | ECSA: 9% loss for 30000 cycles                                                  | Voltage loss at 0.8A cm <sup>-2</sup> : 22mV for 30000 cycles | 5         |
| Ga <sub>0.1</sub> -PtCo                   | /                                                                               | Voltage loss at 0.8A cm <sup>-2</sup> : 27mV for 30000 cycles | 6         |
| MSA-PtCo/C                                | /                                                                               | Voltage loss at 0.8A cm <sup>-2</sup> : 28mV for 30000 cycles | 7         |
| DS-PtFe <sub>0.6</sub> Ti <sub>0.4</sub>  | Mass activity: 13.5% loss for 30000 cycles                                      | Voltage loss at 0.8A cm <sup>-2</sup> : 14mV for 30000 cycles | 8         |
| Pt-Co/C-DA-20-DA-10                       | Mass activity: 4.9% loss for 40000 cycles<br>ECSA: 3.7% loss for 30000 cycles   | Voltage loss at 0.8A cm <sup>-2</sup> : 10mV for 30000 cycles | This work |

1. B. Wu, H. L. Yang, L. B. Li, X. N. Tang, Y. G. Wu, B. Y. Huang, D. Lützenkirchen-Hecht, M. Qiu, K. Yuan and Y. W. Chen, *Advanced Materials*, 2025, **37**.
2. S. N. Hu, W. C. Xu, N. Tian, S. M. Chen, M. Y. Li, J. F. Shen, J. X. Lin, S. L. Guo, X. Y. Huang, Z. Y. Zhou and S. G. Sun, *Energy & Environmental Science*, 2024, **17**, 3099-3111.
3. W. P. Xiao, D. Q. Yan, Q. Zhao, D. Bukhvalov and X. F. Yang, *Applied Catalysis B-Environment and Energy*, 2024, **346**.
4. T. W. Song, C. Xu, Z. T. Sheng, H. K. Yan, L. Tong, J. Liu, W. J. Zeng, L. J. Zuo, P. Yin, M. Zuo, S. Q. Chu, P. Chen and H. W. Liang, *Nature Communications*, 2022, **13**.

5. M. I. Maulana, T. H. Jo, H. Y. Lee, C. Lee, C. Gyan-Barimah, C. H. Shin, J. H. Yu, K. S. Lee, S. Back and J. S. Yu, *Journal of the American Chemical Society*, 2024, **146**, 30922-30932.
6. R. Y. Shao, X. C. Xu, Z. H. Zhou, W. J. Zeng, T. W. Song, P. Yin, A. Li, C. S. Ma, L. Tong, Y. Kong and H. W. Liang, *Nature Communications*, 2023, **14**.
7. L. Zhang, L. Tong, S. Li, C. S. Ma, K. Z. Xue and H. W. Liang, *Journal of Energy Chemistry*, 2025, **101**, 1-6.
8. S. M. Chen, L. K. Chen, N. Tian, S. N. Hu, S. L. Yang, J. F. Shen, J. X. Tang, D. Y. Wu, M. S. Chen, Z. Y. Zhou and S. G. Sun, *Acs Catalysis*, 2024, **14**, 16664-16672.
